# Supplementary material for: In situ solution plasma synthesis of nitrogen-doped carbon nanoparticles as metal-free electrocatalysts for the oxygen reduction reaction
Source: Royal Society of Chemistry journal article supplement (doi:10.1039/c4ta03010a), 2014-01-01
Supplement: c4ta03010a1.pdf [file c4ta03010a1.pdf]

## Supplementary Information

### ***In situ* solution plasma synthesis of nitrogen-doped carbon nanoparticles as metal-free electrocatalysts for the oxygen reduction reaction**

Gasidit Panomsuwan,<sup>\*a</sup> Satoshi Chiba,<sup>a</sup> Youta Kaneko,<sup>a</sup> Nagahiro Saito<sup>bcd</sup> and Takahiro Ishizaki<sup>\*ad</sup>

<sup>a</sup> Department of Materials Science and Engineering, Faculty of Engineering, Shibaura Institute of Technology, Tokyo 135-8548, Japan

<sup>b</sup> Department of Materials, Physics and Energy Engineering, Graduate School of Engineering, Nagoya University, Nagoya 464-8603, Japan

<sup>c</sup> Green Collaborative Research Center, Nagoya University, Nagoya 464-8603, Japan

<sup>d</sup> Core Research for Evolutional Science and Technology (CREST), Japan Science and Technology Agency (JST), Saitama 333-001, Japan

\*Corresponding author: Gasidit Panomsuwan

\*Co-corresponding author: Takahiro Ishizaki

Address: Department of Materials Science and Engineering, Faculty of Engineering, Shibaura Institute of Technology, 3-7-5 Toyosu, Koto-ku, Tokyo 135-8548, Japan

Tel: +81-3-5859-8115

Fax: +81-3-5859-8101

E-mail: i036050@sic.shibaura-it.ac.jp; g.panomsuwan@gmail.com; ishizaki@sic.shibaura-it.ac.jp

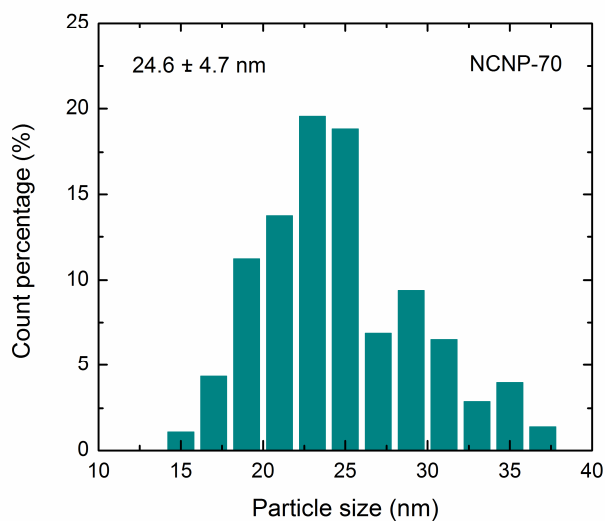

**Fig. S1** Particle size distribution of NCNP-70 deduced from bright-field TEM image.

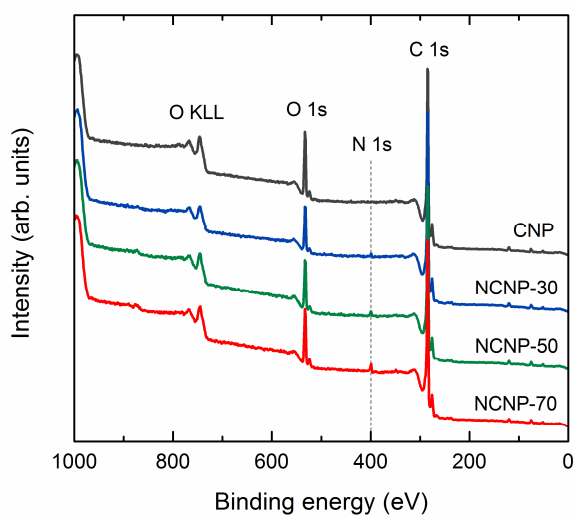

**Fig. S2** XPS survey spectra of CNP, NCNP-30, NCNP-50, and NCNP-70. The vertical dashed line indicates the position of N 1s peak.

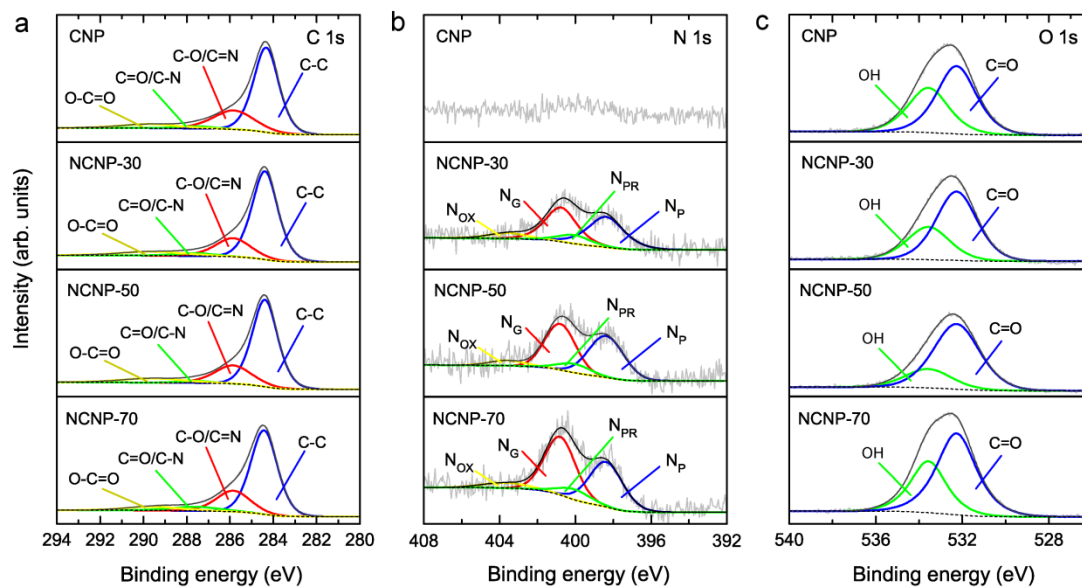

**Fig. S3** High-resolution XPS spectra of all catalysts: (a) C 1s, (b) N 1s and (c) O 1s.

**Table S1** Relative amount of different nitrogen bonding configurations obtained from the qualitative analysis of high-resolution XPS N 1s spectra of NCNP-30, NCNP-50, and NCNP-70 in Fig. S3b.

| Sample  | XPS N1s spectra       |                         |                       |                                |
|---------|-----------------------|-------------------------|-----------------------|--------------------------------|
|         | Pyridinic-N ( $N_P$ ) | Pyrrolic-N ( $N_{PR}$ ) | Graphitic-N ( $N_G$ ) | Pyridinic N-oxide ( $N_{OX}$ ) |
| NCNP-30 | 41.1%                 | 10.4%                   | 40.3%                 | 8.2%                           |
| NCNP-50 | 43.7%                 | 8.5%                    | 42.3%                 | 5.5%                           |
| NCNP-70 | 38.9%                 | 8.7%                    | 46.6%                 | 5.8%                           |

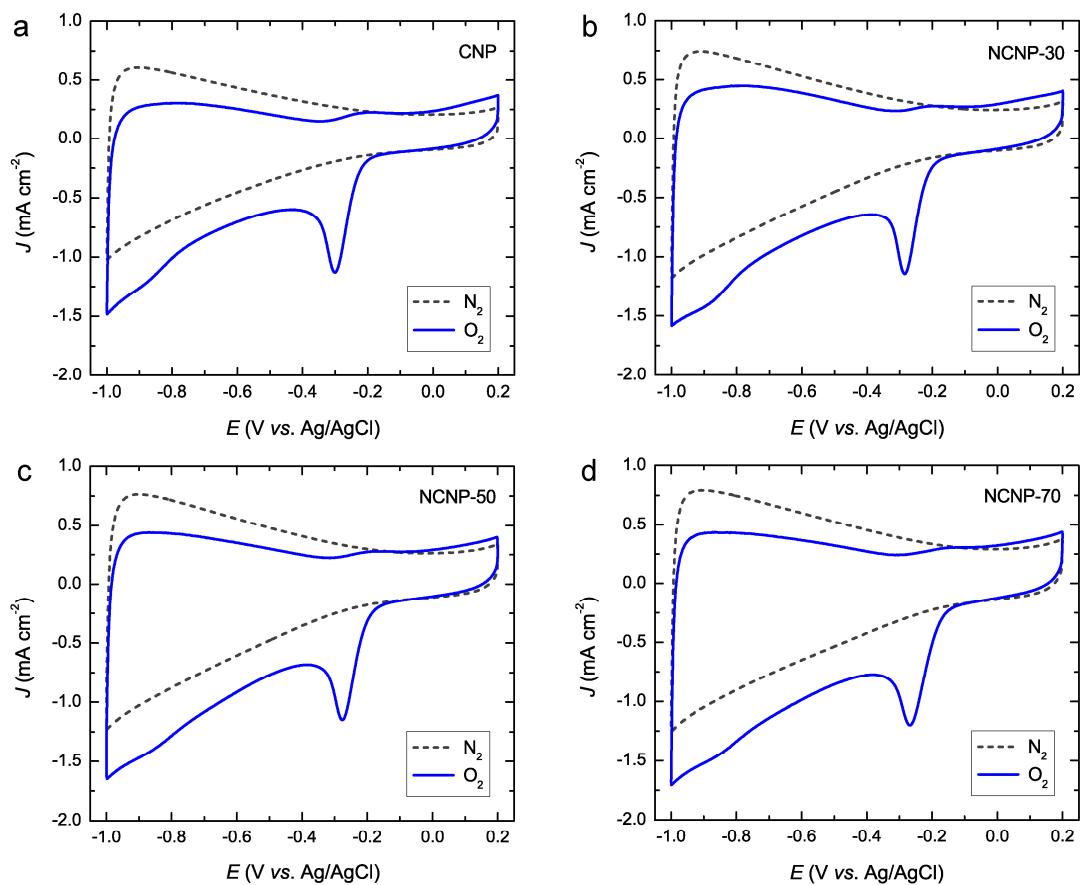

**Fig. S4** CV curves of the ORR for (a) CNP, (b) NCNP-30, (c) NCNP-50, and (d) NCNP-70 modified on GC electrodes in a 0.1 M KOH solution saturated with  $N_2$  (black dashed line) and  $O_2$  (blue solid line).

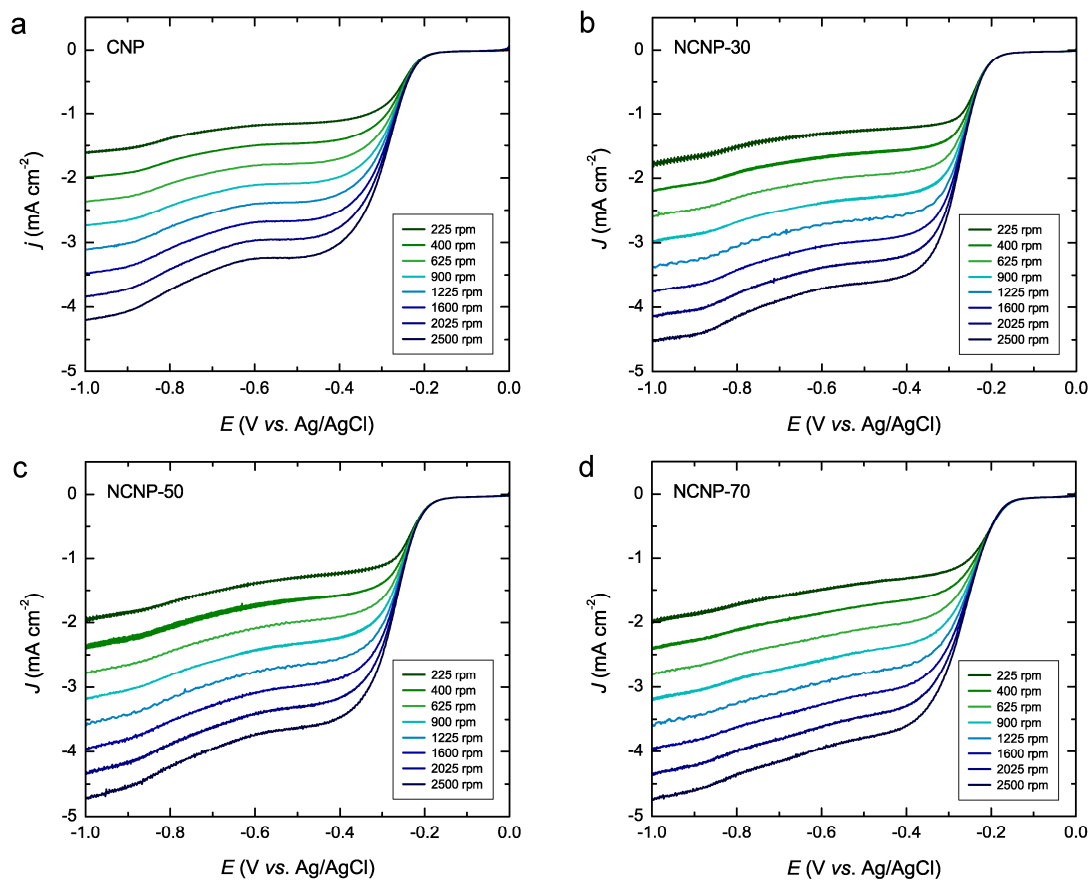

**Fig. S5** LSV curves of the ORR for all catalysts in an O<sub>2</sub>-saturated 0.1 M KOH solution at a scan rate of 10 mV s<sup>-1</sup> and different rotation speeds from 225 to 2500 rpm: (a) CNP, (b) NCNP-30, (c) NCNP-50, and (d) NCNP-70.

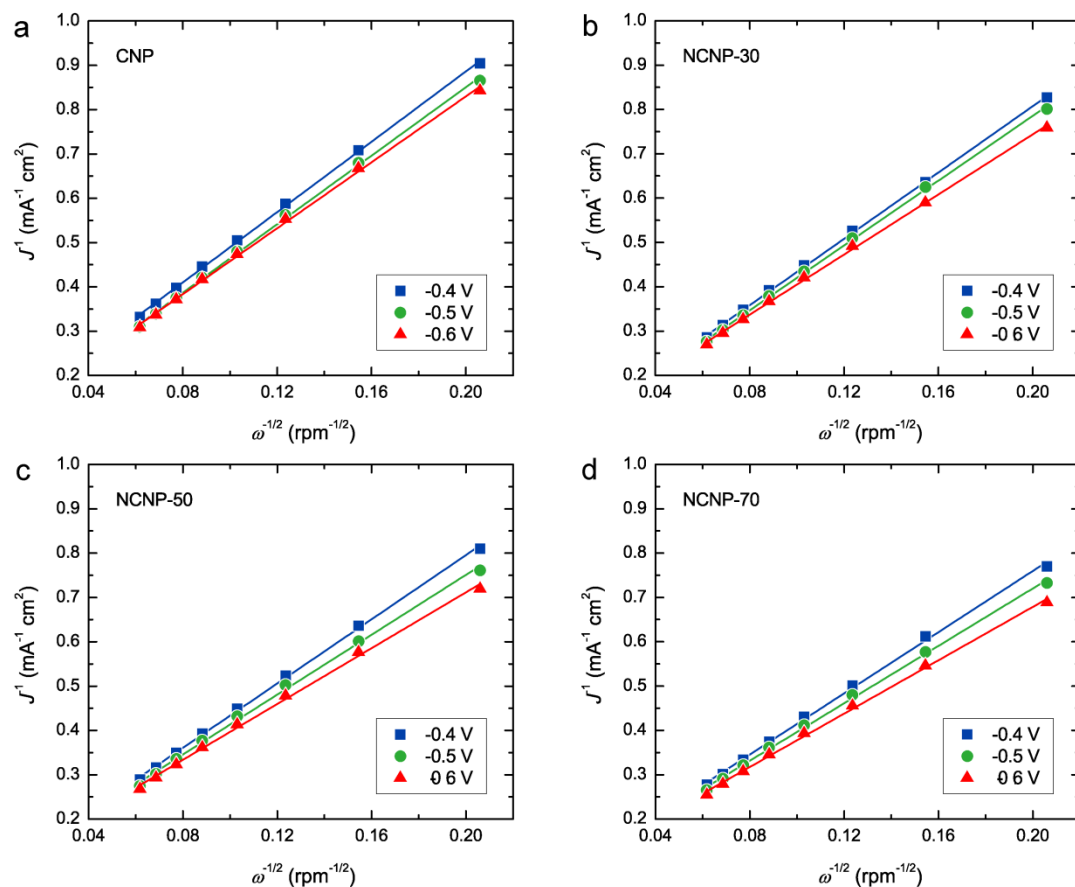

**Fig. S6** K–L plots at potentials from  $-0.4$  to  $-0.6$  V on the basis of LSV data in Fig. S5 of (a) CNP, (b) NCNP-30, (c) NCNP-50, and (d) NCNP-70.

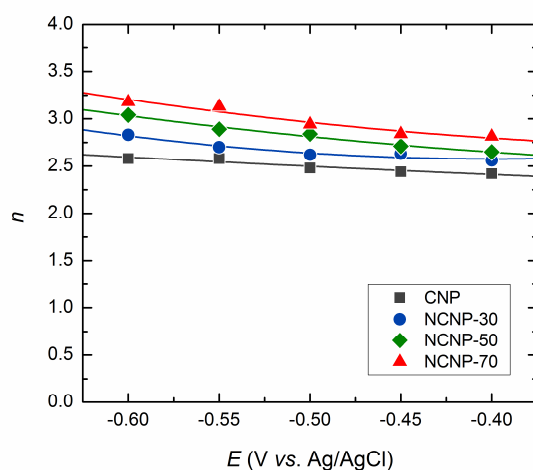

**Fig. S7** Electron transfer number ( $n$ ) obtained from the K–L plots (Fig. S6) as a function of potential from  $-0.4$  to  $-0.6$  V: (a) CNP, (b) NCNP-30, (c) NCNP-50, and (d) NCNP-70.

**Table S2** Electrochemical results of bare GC electrode, 20%Pt/C, CNP, NCNP-30, NCNP-50, and NCNP-70 obtained at a potential of  $-0.4$  V. The onset potential ( $E_{\text{onset}}$ ) is determined from LSV-RRDE curve.

|         | $E_{\text{onset}}$<br>(V vs. Ag/AgCl) | $J_K$<br>(mA cm $^{-2}$ ) | $n_{K-L}$ | $n_{\text{RRDE}}$ | HO $_2^-$ yield<br>(%) |
|---------|---------------------------------------|---------------------------|-----------|-------------------|------------------------|
| GC      | -0.31                                 | 7.87                      | 2.38      | 2.34              | 83.0                   |
| 20%Pt/C | -0.09                                 | 19.6                      | 4.05      | 3.85              | 7.65                   |
| CNP     | -0.22                                 | 10.8                      | 2.42      | 2.40              | 81.4                   |
| NCNP-30 | -0.21                                 | 13.9                      | 2.56      | 2.62              | 68.6                   |
| NCNP-50 | -0.20                                 | 14.1                      | 2.65      | 2.71              | 64.9                   |
| NCNP-70 | -0.17                                 | 14.5                      | 2.80      | 2.86              | 59.5                   |

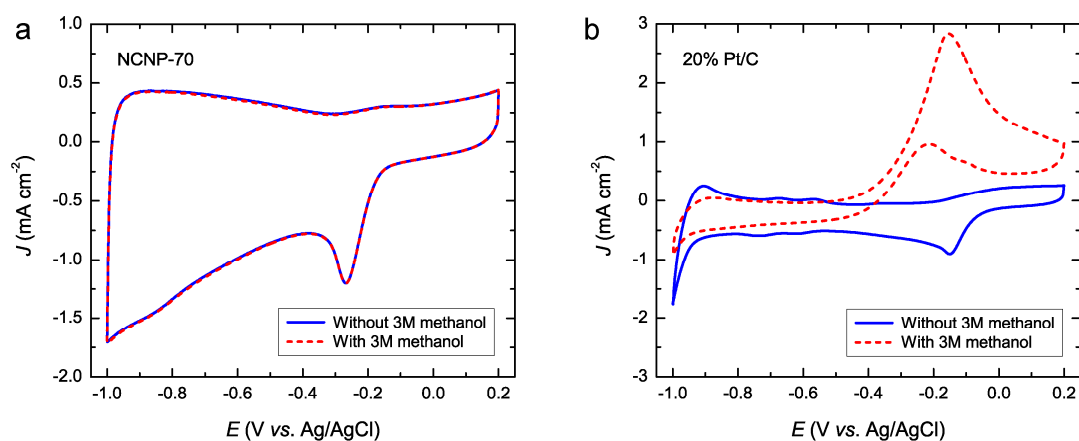

**Fig. S8** Comparative CV curves with (solid line) and without the introduction of 3 M methanol (dashed line) of NCNP-70 (b) and 20 wt% Pt/C.
